# Supplementary material for: RAD9 deficiency enhances radiation induced bystander DNA damage and transcriptomal response
Source: PubMed Central journal article supplement (PMC4261775; doi:10.1186/1748-717x-9-206), 2014-09-18
Supplement: 13014_2014_1171_MOESM2_ESM.pdf [file 13014_2014_1171_MOESM2_ESM.pdf]

## Additional file 2

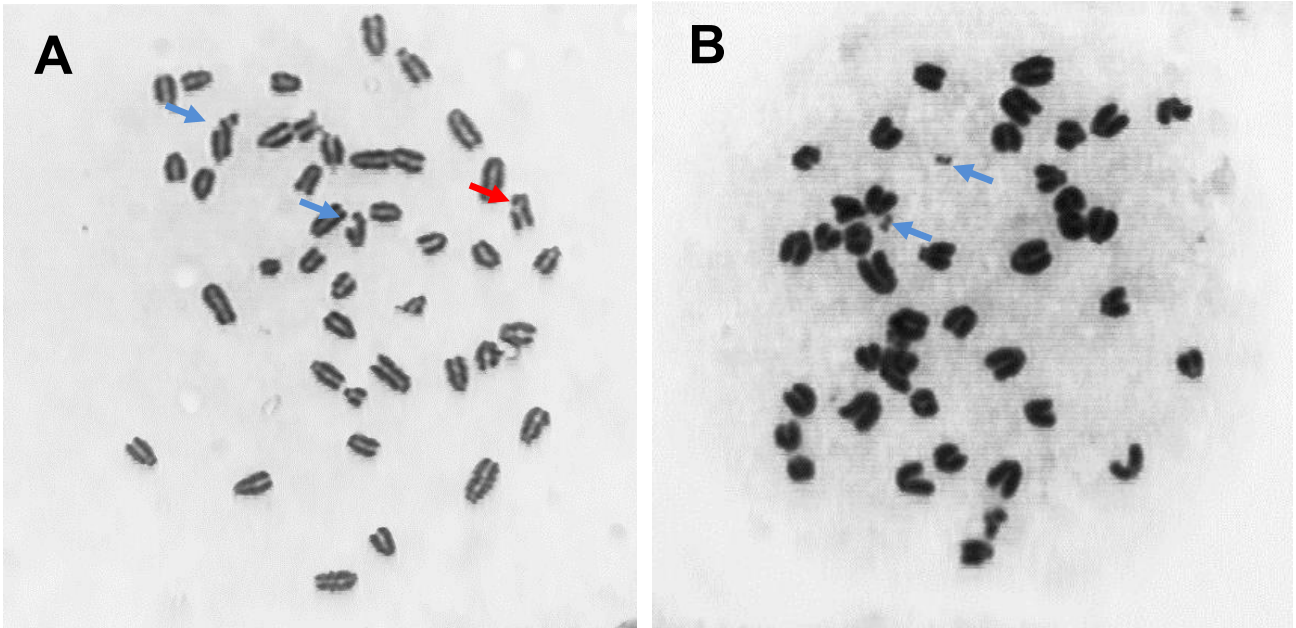

Representative images depicting the types of chromatid (panel A) and chromosome-type (panel B) aberrations scored in this study. In panel A, blue arrows point to chromatid breaks and the red arrow points to a chromatid gap. In panel B, blue arrows point to acentric chromosome fragments.
